# Supplementary material for: Skeletal Muscle Cell Growth Alters the Lipid Composition of Extracellular Vesicles
Source: MDPI journal article supplement (doi:10.3390/membranes11080619), 2021-08-12
Supplement: s1 [file s1]

Supplementary Material

# Skeletal Muscle Cell Growth Alters the Lipid Composition of Extracellular Vesicles

Taylor R. Valentino <sup>1</sup>, Blake D. Rule <sup>2</sup>, C. Brooks Mobley <sup>1</sup>, Mariana Nikolova-Karakashian <sup>1</sup> and Ivan J. Vechetti <sup>2,\*</sup>

<sup>1</sup> Department of Physiology, College of Medicine, Lexington, KY 40536, USA; trvalentino@uky.edu (T.R.V.); c.brooks.mobley@uky.edu (C.B.M.); mariana.karakashian@uky.edu (M.N.-K.)

<sup>2</sup> Department of Nutrition and Health Sciences, College of Education and Human Sciences, University of Nebraska-Lincoln, Lincoln, NE 68583, USA; brule2@unl.edu

\* Correspondence: ivechetti@unl.edu; Tel.: +402-472-3716; Fax: +402-472-2895

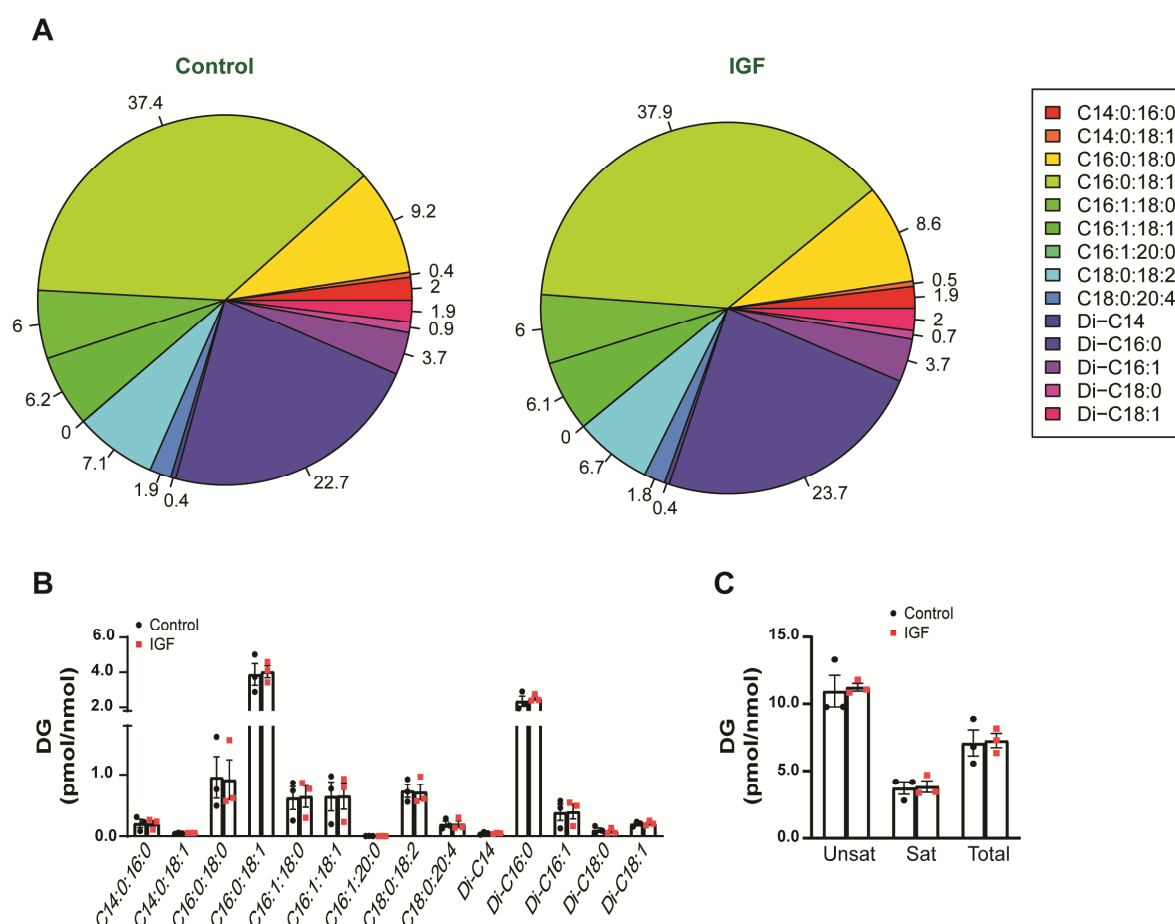

**Figure S1.** Diacylglycerol (DG) composition of C2C12 myotube cells. **A-** Pie chart highlighting DG species between myotube control (control) and IGF-treated myotubes (Treated); **B-** DG species between groups normalized for the amount of lipid-associated phosphate (a measure of total phospholipids in each preparation); **C-** Unsaturated, saturated and total DG between control and treated cells. Data is presented as percentage (A) and as mean  $\pm$  SE (B-C) (n=3) with significance denoted by an asterisk compared to Control.

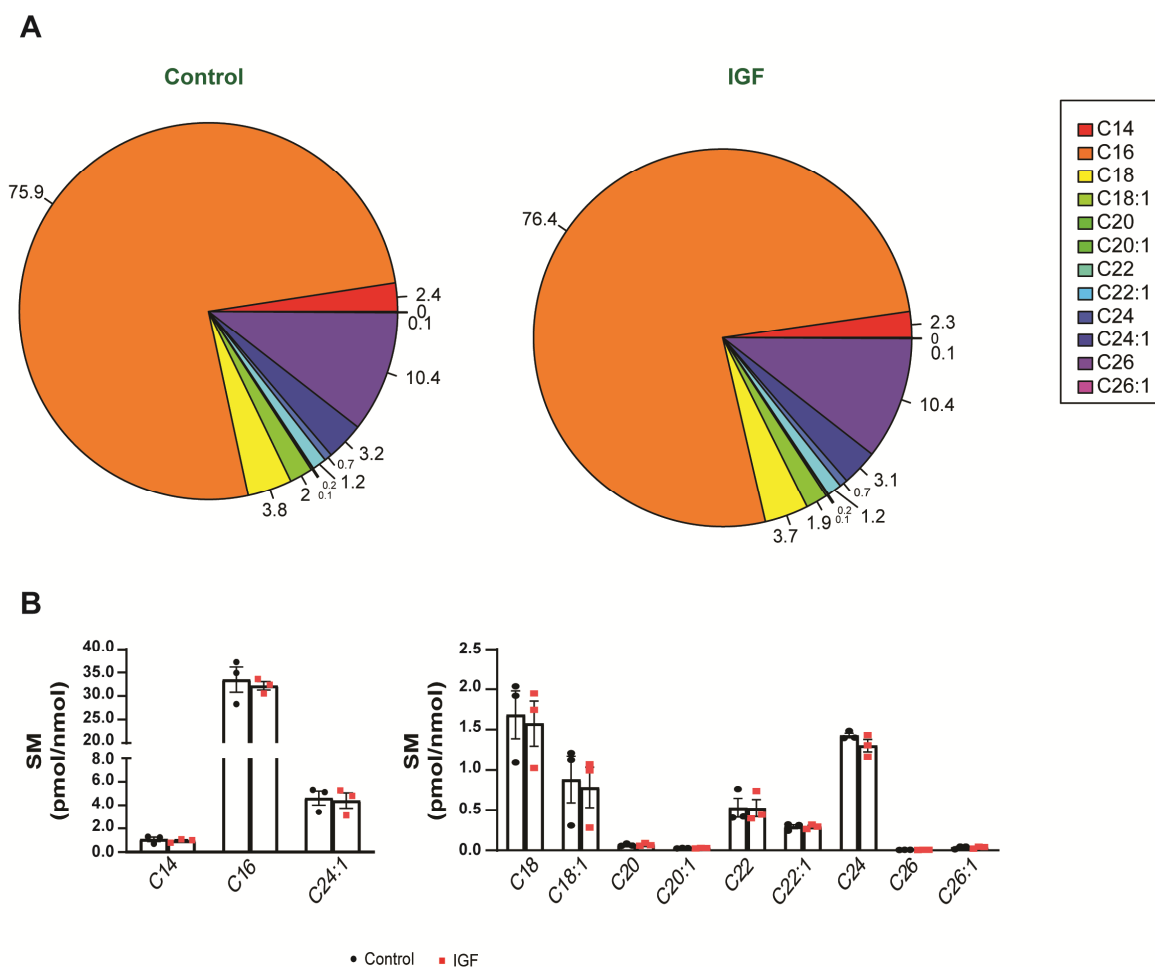

**Figure S2.** Sphingomyelin (SM) composition of C2C12 myotube cells. A- Pie chart highlighting SM species between myotube control (control) and IGF-treated myotubes (Treated); B- SM species between groups normalized for the amount of lipid-associated phosphate (a measure of total phospholipids in each preparation). Data is presented as percentage (A) and as mean  $\pm$  SE (B) (n=3) with significance denoted by an asterisk compared to Control.

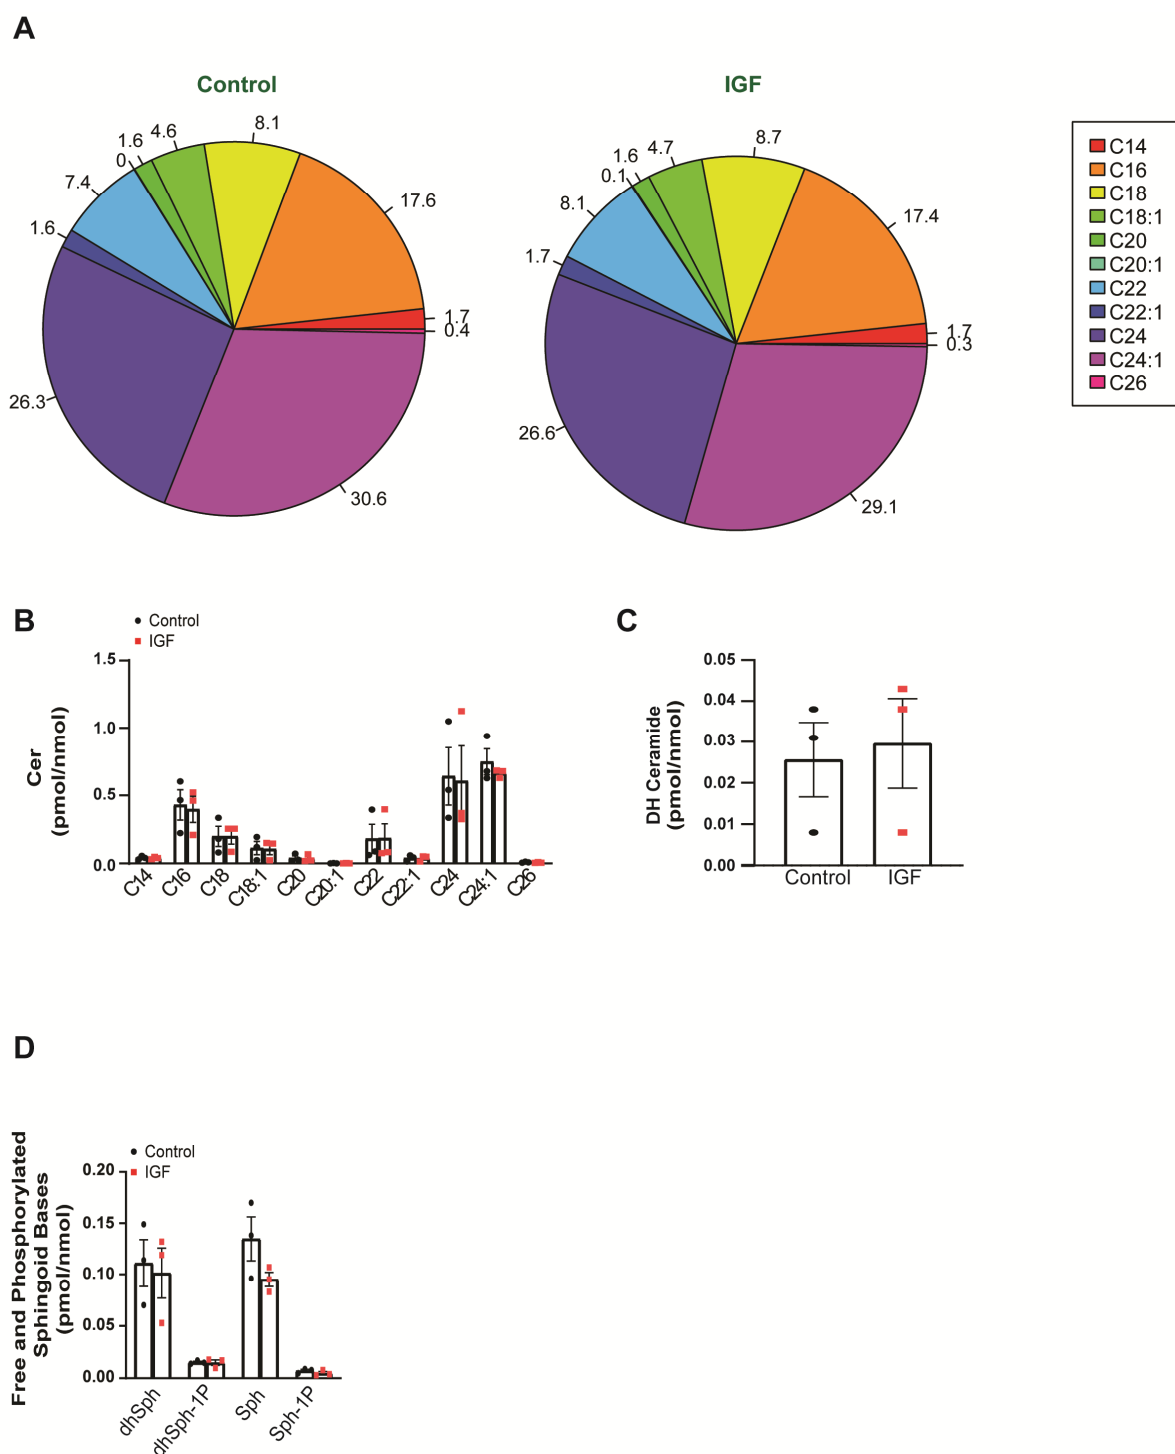

**Figure S3.** Ceramide (Cer) composition of C2C12 myotube cells. **A-** Pie chart highlighting Cer species between myotube control (control) and IGF-treated myotubes (Treated); **B-** Cer species between groups normalized for the amount of lipid-associated phosphate (a measure of total phospholipids in each preparation); Total amount of dihydro-ceramide (DH) (**C**) and sphingoid bases (**D**) between Control and Treated cells. dhSph: dihydrosphingosine, dhSph-1P: dihydrosphingosine-phosphate, Sph: sphingosine; Sph-1P: sphingosine-phosphate. Data is presented as percentage (**A**) and as mean  $\pm$  SE (**B-D**) ( $n=3$ ) with significance denoted by an asterisk compared to Control.
